# Supplementary material for: Machine Learning-Based Assessment Indicates Patient-Reported Outcomes to Be Less Reliable than Clinical Parameters for Predicting 1-Year Survival in Cancer Patients.
Source: Preprints.org preprint supplement (doi:10.20944/preprints202311.0042.v1), 2023-11-01

**Appendix A:**

Appendix A. Representation of ROC curve using non-PRO variables.

**
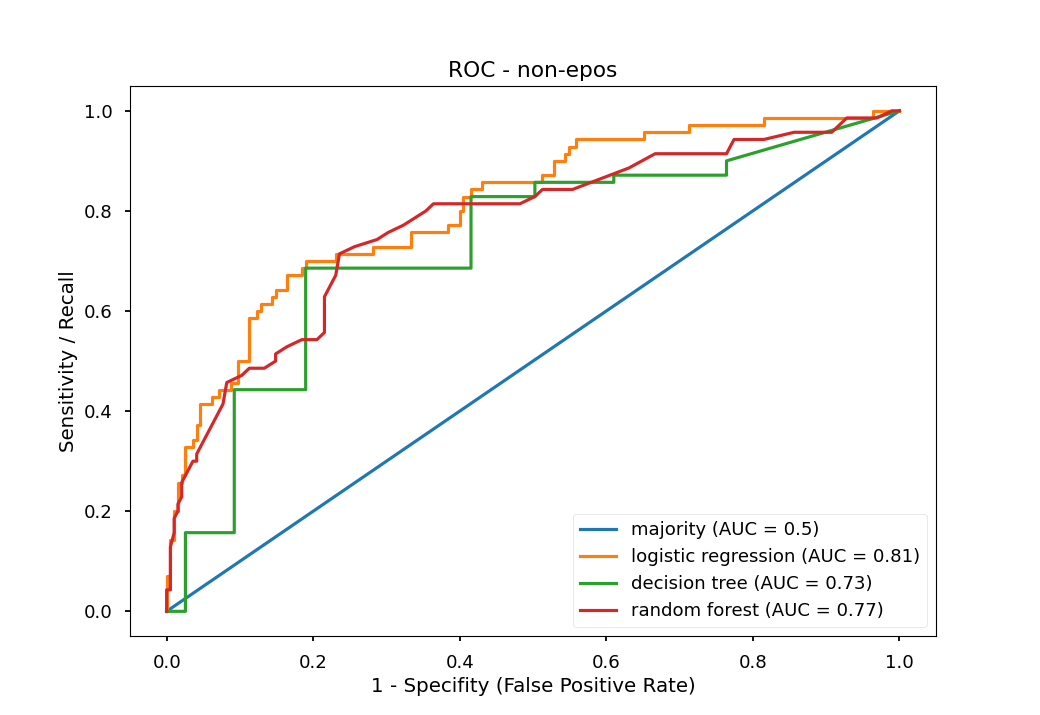
**

**Appendix B:**

Decision Tree

1. Decision tree using all variables.


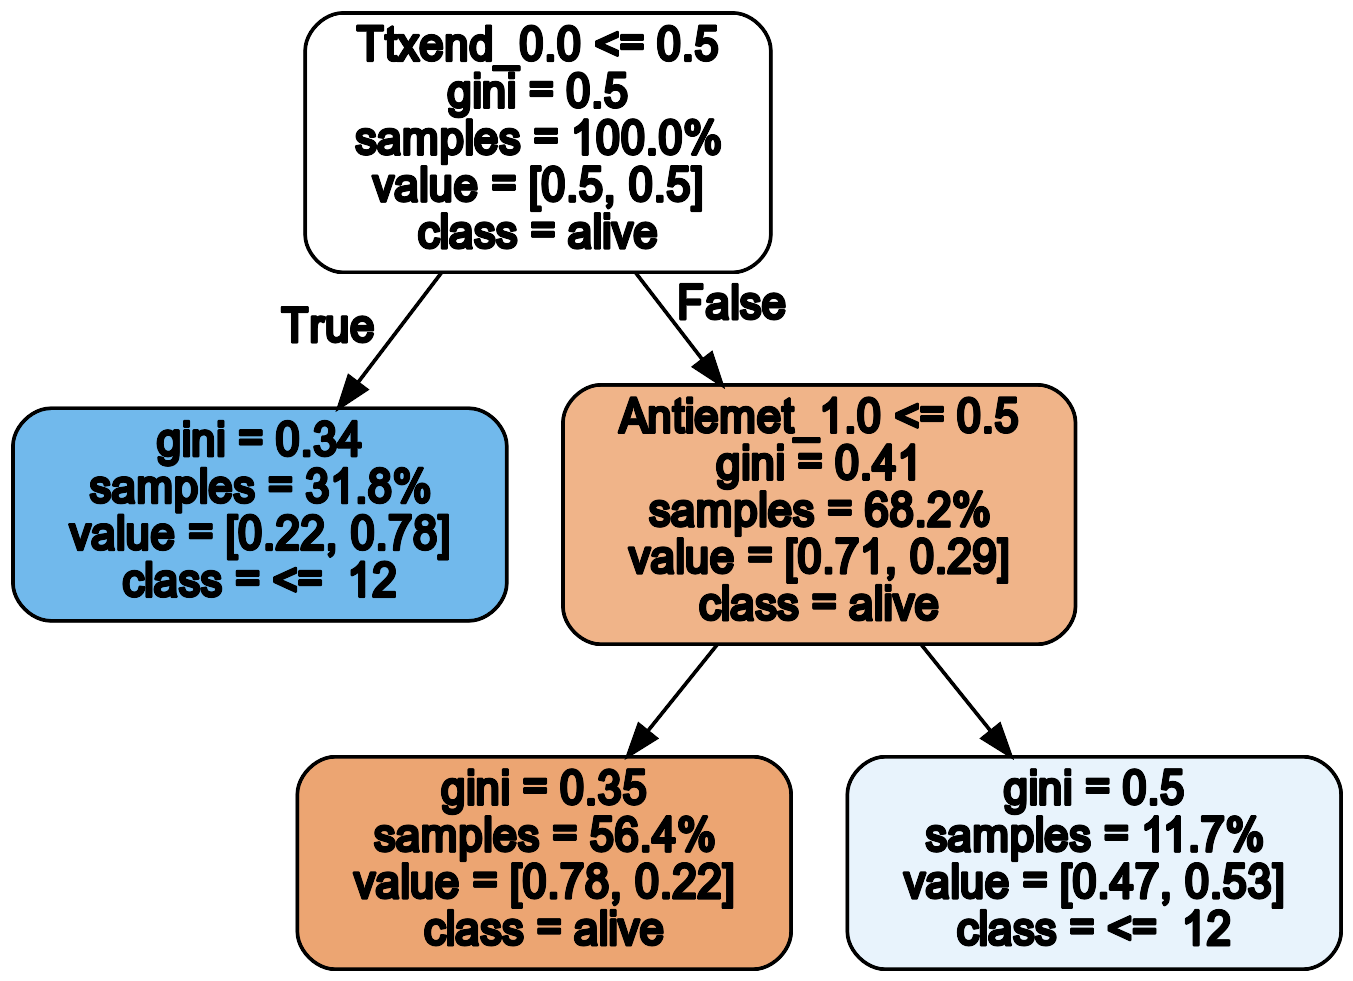


1. Decision tree using PRO variables.


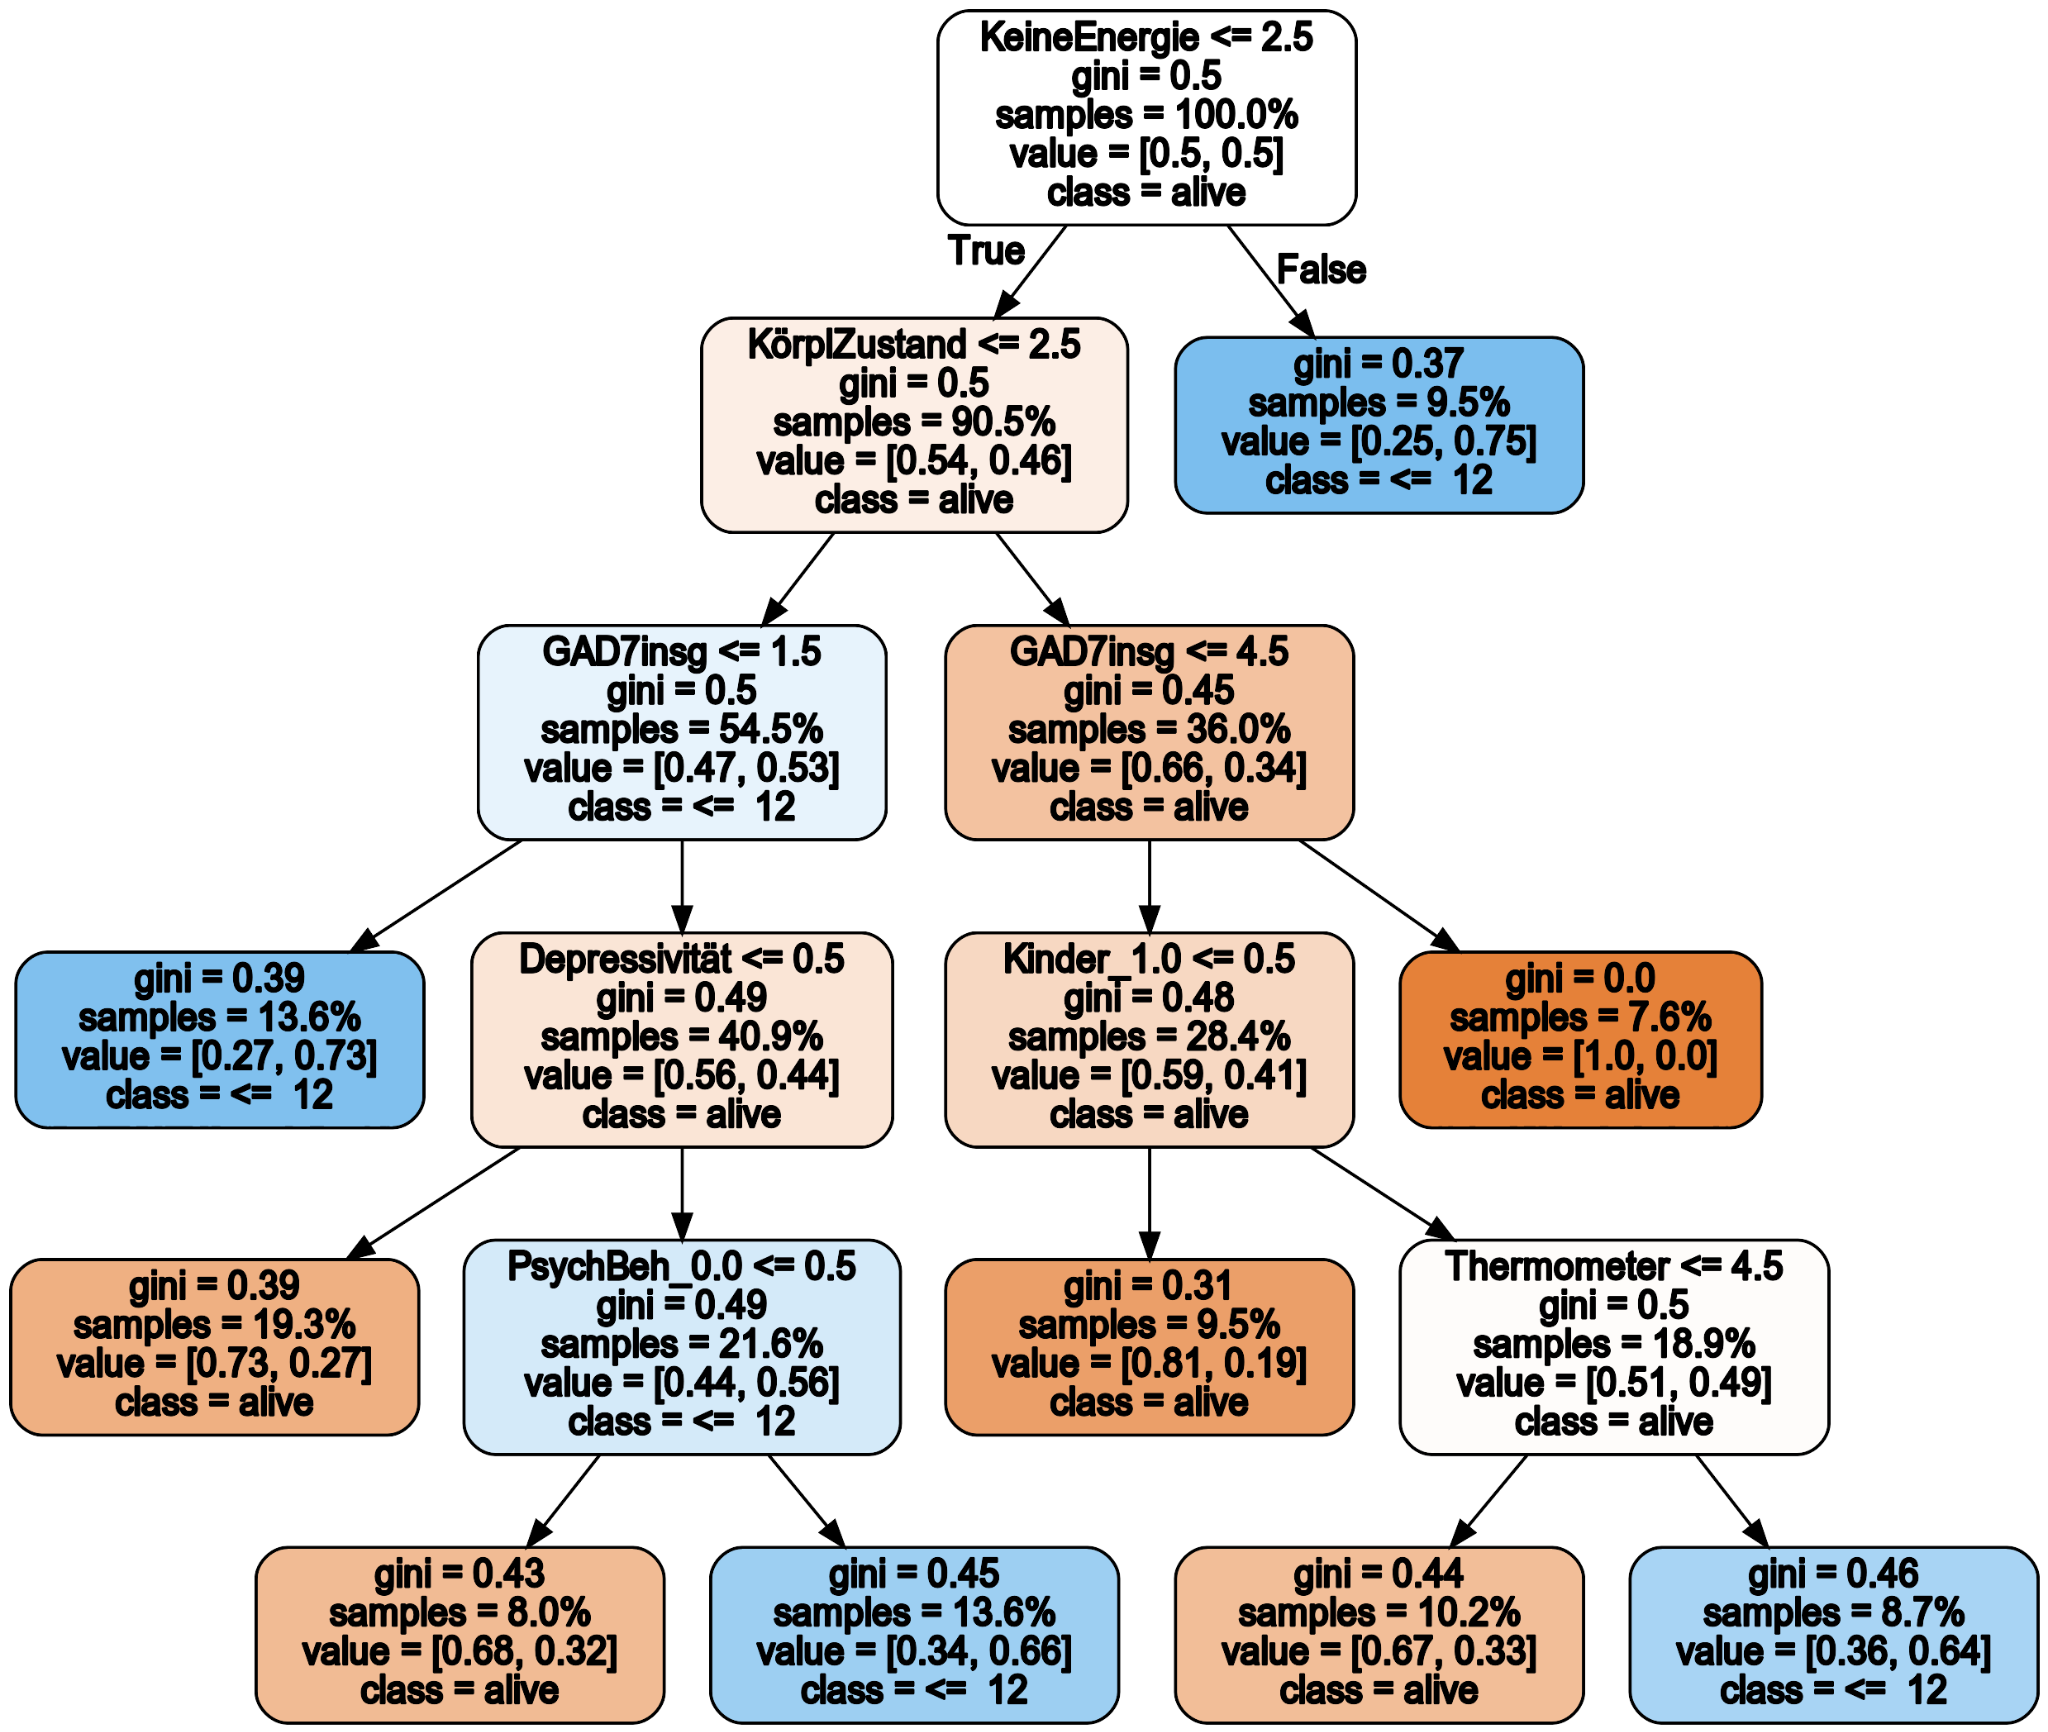


1. Decision tree using non-PRO variables.


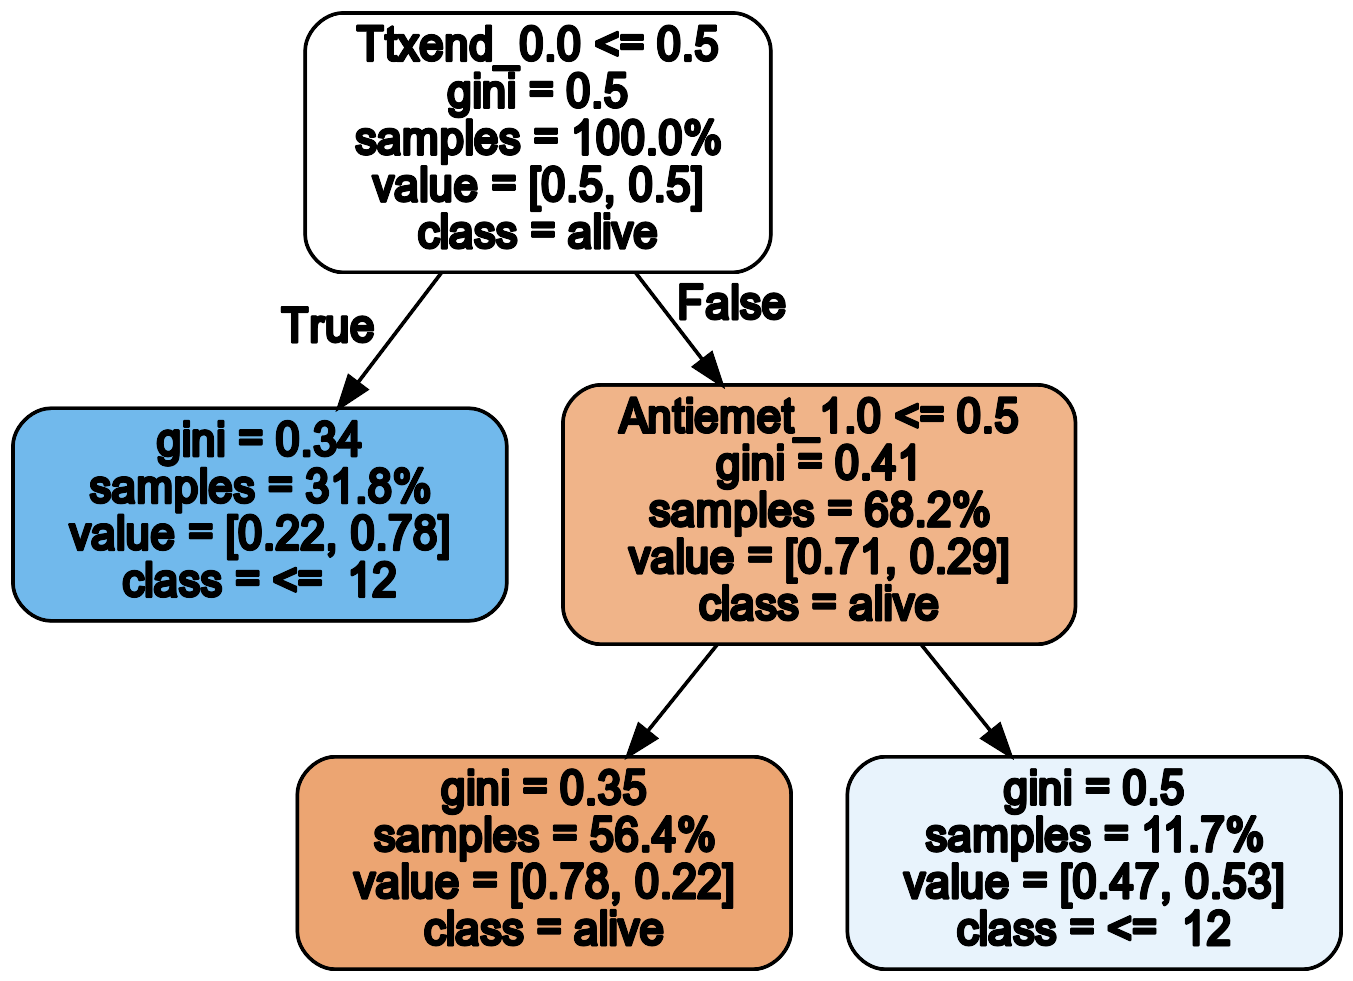

Supplement: Supplementary file 3 [file supplementary]
